# Supplementary material for: Transport of regional pollutants through a remote trans-Himalayan valley in Nepal
Source: Copernicus journal article supplement (doi:10.5194/acp-2016-824), 2016-11-08
Supplement: Supplementary file 1 [file acp-2016-824-supplement.pdf]

5

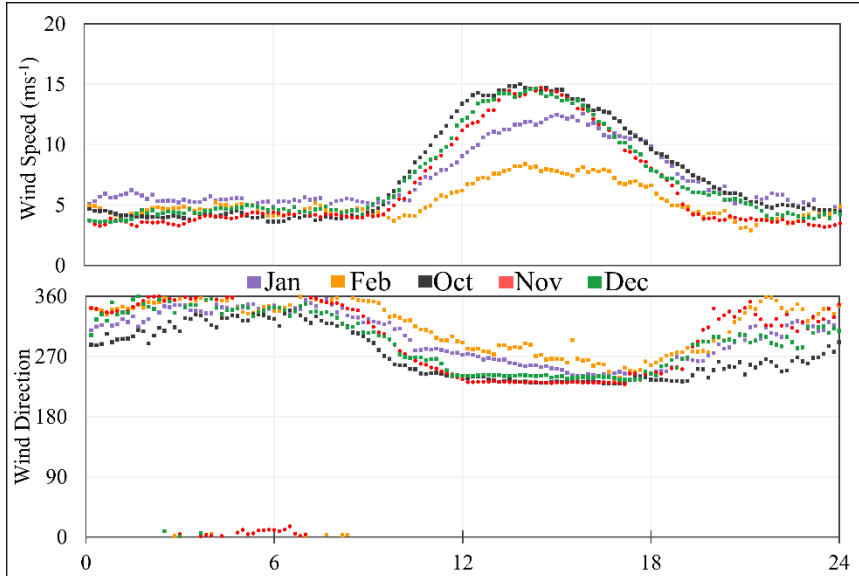

10

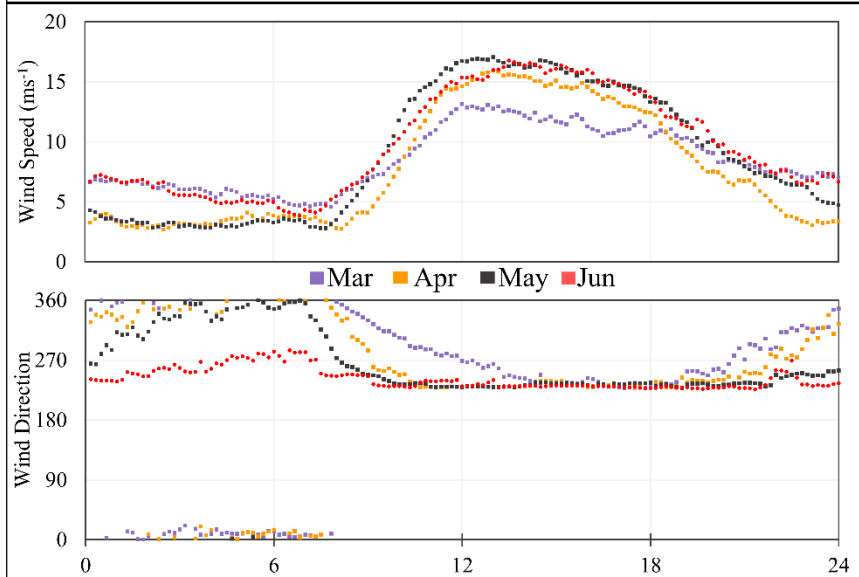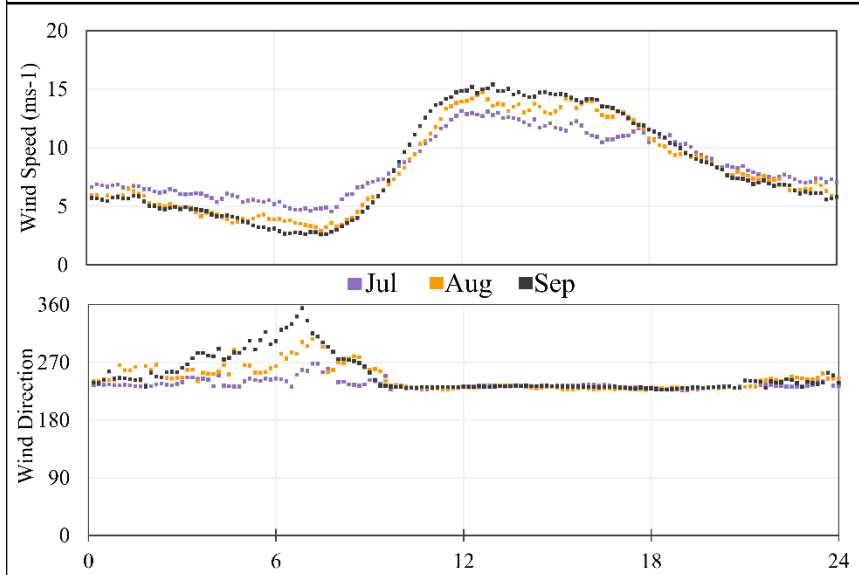

Supplement. Average diurnal variability in wind speed and direction for each month of 2013 at JSM\_AWS\_2 during the pre-monsoon (upper two panels), post-monsoon (middle two panels), and monsoon (lower two panels) periods.
